# Supplementary material
Source: MDPI journal article supplement (https://www.mdpi.com/2071-1050/15/23/16491)
Supplement: s1 [file s1 › sustainability-2659769-supplementary.pdf]

## Supplementary Materials

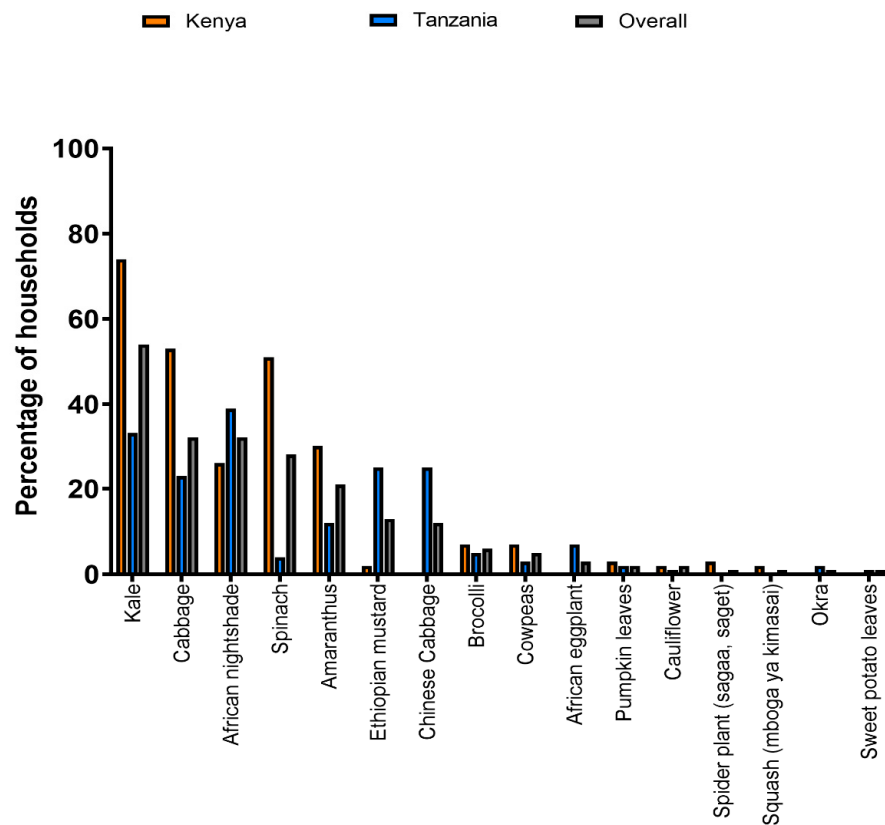

**Figure S1:** Types of crucifers and traditional African vegetables grown in Kenya and Tanzania.

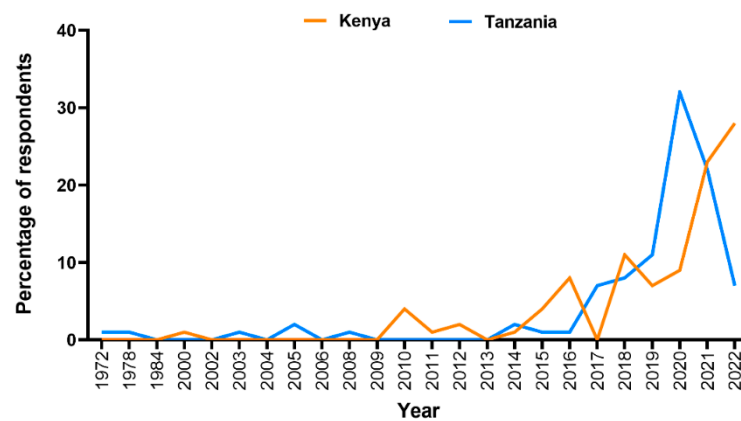

**Figure S2:** The years in which farmer training on vegetable agroecological production was carried out Kenya and Tanzania.

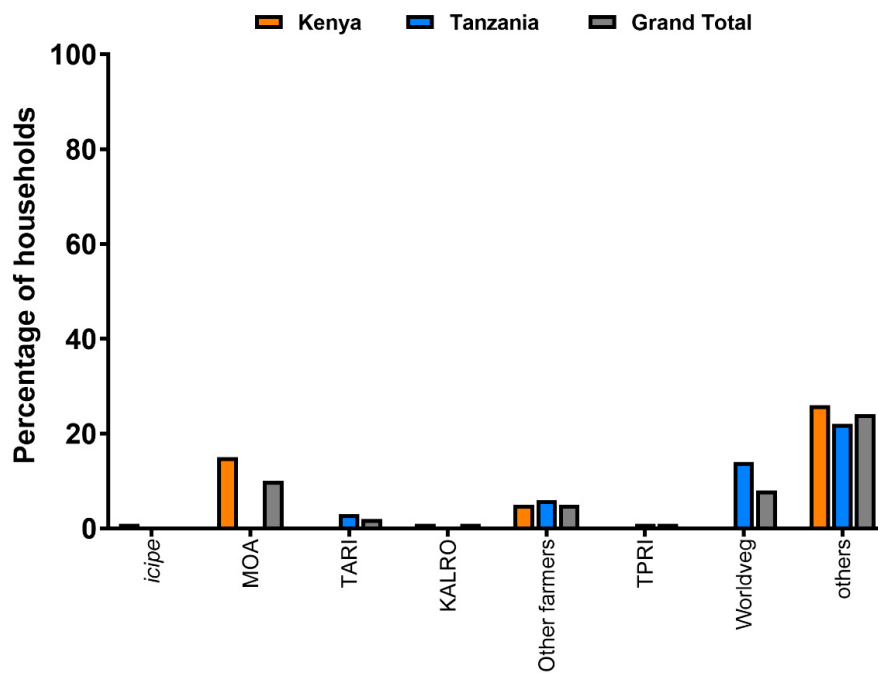

**Figure S3:** Organizations that trained vegetable farmers on agroecological production in Kenya and Tanzania.

**Table S1:** Types of plants used by vegetable farmers to repel different pests in Kenya and Tanzania.

| Type of pest/<br>repellant plant | Flea beetle | Stem weevil | Stink bug | Amaranth stem weevils | Leaf beetles | Root Knot | Others | Total |
|----------------------------------|-------------|-------------|-----------|-----------------------|--------------|-----------|--------|-------|
| Marigold                         | 8           | 11          | 1         | 3                     | 0            | 0         | 0      | 23    |
| Mustard                          | 2           | 1           | 0         | 0                     | 0            | 0         | 0      | 3     |
| Onions                           | 13          | 32          | 0         | 4                     | 1            | 0         | 9      | 59    |
| Rosemary                         | 2           | 2           | 0         | 0                     | 0            | 0         | 1      | 5     |
| Beets                            | 0           | 0           | 0         | 1                     | 0            | 0         | 0      | 1     |
| Sage                             | 0           | 1           | 0         | 0                     | 0            | 0         | 0      | 1     |
| Coriander                        | 0           | 5           | 0         | 0                     | 0            | 0         | 1      | 6     |
| Mint                             | 1           | 1           | 0         | 0                     | 0            | 0         | 0      | 2     |
| Others                           | 1           | 7           | 1         | 1                     | 0            | 2         | 3      | 15    |
| Number of farmers                | 27          | 60          | 2         | 9                     | 1            | 2         | 14     | 115   |

**Table S2:** Types of plants used by vegetable farmers to attract different pests in Kenya and Tanzania.

| Type of pests/Trap crops used                        | Flea beetle | Stem weevil | <i>Lepidopte</i> | Amaranth stem weevils | Root Knot | Total |
|------------------------------------------------------|-------------|-------------|------------------|-----------------------|-----------|-------|
| Marigold                                             | 0           | 1           | 0                | 0                     | 0         | 1     |
| Garlic                                               | 0           | 0           | 0                | 0                     | 1         | 1     |
| Onions                                               | 4           | 3           | 0                | 3                     | 0         | 10    |
| Rosemary                                             | 1           | 0           | 0                | 0                     | 0         | 1     |
| Beets                                                | 0           | 0           | 0                | 0                     | 0         | 1     |
| Coriander                                            | 1           | 1           | 0                | 0                     | 0         | 2     |
| Mint                                                 | 0           | 0           | 0                | 0                     | 0         | 0     |
| Others (maize, sweet potatoes, Napier grass, millet) | 2           | 7           | 1                | 0                     | 1         | 11    |
| Total                                                | 8           | 12          | 1                | 3                     | 2         | 27    |
